# Supplementary material for: Thermal Conductivity and Electrical Resistivity of Melt-Mixed Polypropylene Composites Containing Mixtures of Carbon-Based Fillers
Source: PubMed Central journal article supplement (PMC6630210; doi:10.3390/polym11061073), 2019-06-21
Supplement: polymers-11-01073-s001.pdf [file polymers-11-01073-s001.pdf]

**Supplementary Materials:** Table S1. Thermal conductivity and electrical volume resistivity of PP composites filled with different kind of carbon black at a filler content of 5 vol%; Table S2. Thermal conductivity and electrical volume resistivity of PP composites filled with different kinds of expanded graphite at a filler content of 5 vol%; Table S3. Thermal conductivity and electrical volume resistivity of PP composites filled with different kinds of graphite at a filler content of 5 vol%.

**Table S1.** Thermal conductivity and electrical volume resistivity of PP composites filled with different kind of carbon black at a filler content of 5 vol%

| <b>Filler name</b>  | <b>Thermal conductivity<br/>[W/(m·K)]</b> | <b>Electrical resistivity<br/>[Ohm cm]</b> | <b>Manufacturer</b>                                  |
|---------------------|-------------------------------------------|--------------------------------------------|------------------------------------------------------|
| XPB538              | 0.25                                      | $1.64 \cdot 10^2$                          | Orion Engineered Carbons GmbH,<br>Hanau, Germany     |
| HIBlack 40B2        | 0.30                                      | $1.29 \cdot 10^2$                          | Orion Engineered Carbons GmbH,<br>Hanau, Germany     |
| Grapacarb (LF-C)    | 0.26                                      | $5.02 \cdot 10^3$                          | Harald Scholz & Co. GmbH,<br>Recklinghausen, Germany |
| HS 0060             | 0.30                                      | $2.16 \cdot 10^2$                          | Harald Scholz Co. GmbH,<br>Recklinghausen, Germany   |
| Lionite EC 200L     | 0.34                                      | $1.74 \cdot 10^1$                          | LION Corporation, Tokyo, Japan                       |
| OMCARB C40          | 0.28                                      | $2.04 \cdot 10^{17}$                       | Omsk Carbon Group, Omsk, Russia                      |
| OMCARB C140         | 0.29                                      | $6.25 \cdot 10^1$                          | Omsk Carbon Group, Omsk, Russia                      |
| OMCARB CH85         | 0.30                                      | $3.61 \cdot 10^3$                          | Omsk Carbon Group, Omsk, Russia                      |
| OMCARB CH200        | 0.29                                      | $6.25 \cdot 10^1$                          | Omsk Carbon Group, Omsk, Russia                      |
| OMCARB CH210        | 0.31                                      | $8.11 \cdot 10^2$                          | Omsk Carbon Group, Omsk, Russia                      |
| OMCARB CH600        | 0.28                                      | $1.41 \cdot 10^2$                          | Omsk Carbon Group, Omsk, Russia                      |
| Mechano Cond 5P2    | 0.30                                      | $8.11 \cdot 10^2$                          | H.C. Carbon GmbH,<br>Rednitzhembach, Germany         |
| Mechano Cond 5CP3   | 0.34                                      | $4.42 \cdot 10^{14}$                       | H.C. Carbon GmbH,<br>Rednitzhembach, Germany         |
| Vulcan XC72 (VXC72) | 0.29                                      | $2.85 \cdot 10^2$                          | Cabot Corporation, Billerica, United<br>States       |
| BOTLEK VXC500       | 0.30                                      | $7.79 \cdot 10^1$                          | Cabot Corporation, Billerica, United<br>States       |
| Ketjenblack EC300J  | 0.31                                      | $1.10 \cdot 10^1$                          | AkzoNobel, Amsterdam,<br>Netherlands                 |
| Ketjenblack EC600JD | 0.34                                      | $4.15 \cdot 10^0$                          | AkzoNobel, Amsterdam,<br>Netherlands                 |
| ENSACO 150g (E150g) | 0.31                                      | $1.33 \cdot 10^5$                          | Imerys Graphite & Carbon, Bironico,<br>Switzerland   |
| ENSACO 250g (E250g) | 0.31                                      | $4.87 \cdot 10^1$                          | Imerys Graphite & Carbon, Bironico,<br>Switzerland   |
| TOKABLACK 4300      | 0.29                                      | $5.18 \cdot 10^{17}$                       | Tokai Carbon Co., LTD, Tokyo, Japan                  |
| TOKABLACK 4400      | 0.29                                      | $1.08 \cdot 10^4$                          | Tokai Carbon Co., LTD, Tokyo, Japan                  |
| TOKABLACK 4500      | 0.30                                      | $1.53 \cdot 10^5$                          | Tokai Carbon Co., LTD, Tokyo, Japan                  |
| TOKABLACK 5500      | 0.30                                      | $7.50 \cdot 10^1$                          | Tokai Carbon Co., LTD, Tokyo, Japan                  |

**Table S2.** Thermal conductivity and electrical volume resistivity of PP composites filled with different kind of expanded graphite at a filler content of 5 vol%.

| <b>Filler name</b> | <b>Thermal conductivity [W/(m·K)]</b> | <b>Electrical resistivity [Ohm cm]</b> | <b>Manufacturer</b>                 |
|--------------------|---------------------------------------|----------------------------------------|-------------------------------------|
| GFG350             | 1.05                                  | $7.71 \cdot 10^4$                      | SGL CARBON GmbH, Meitingen, Germany |
| GFG600             | 1.23                                  | $8.12 \cdot 10^{10}$                   | SGL CARBON GmbH, Meitingen, Germany |
| GFG900             | 1.05                                  | $1.15 \cdot 10^2$                      | SGL CARBON GmbH, Meitingen, Germany |
| GFG1000            | 0.66                                  | $6.47 \cdot 10^6$                      | SGL CARBON GmbH, Meitingen, Germany |
| GFG1200            | 0.95                                  | $1.40 \cdot 10^2$                      | SGL CARBON GmbH, Meitingen, Germany |

**Table S3 part 1.** Thermal conductivity and electrical volume resistivity of PP composites filled with different kinds of graphite at a filler content of 5 vol%.

| <b>Filler name</b>     | <b>Thermal conductivity [W/(m·K)]</b> | <b>Electrical resistivity [Ohm cm]</b> | <b>Manufacturer</b>                                    |
|------------------------|---------------------------------------|----------------------------------------|--------------------------------------------------------|
| EP1005                 | 0.33                                  | $6.35 \cdot 10^8$                      | Richard Anton KG, Gräfeling, Germany                   |
| SC150                  | 0.51                                  | $4.39 \cdot 10^7$                      | Graphit Kropfmühl GmbH, Hauzenberg, Germany            |
| SC750                  | 0.68                                  | $4.55 \cdot 10^4$                      | Graphit Kropfmühl GmbH, Hauzenberg, Germany            |
| GHL3292                | 0.40                                  | $8.09 \cdot 10^{16}$                   | GEORG H. LUH GmbH, Walluf, Germany                     |
| Technographit, synth.  | 0.32                                  | $1.14 \cdot 10^9$                      | TECHNOGRAFIT GmbH, Eltville, Germany                   |
| Thielmann, syn.Graphit | 0.39                                  | $1.10 \cdot 10^9$                      | Thielmann Graphite GmbH & Co. KG, Grolsheim, Germany   |
| Mechano CAP1P1         | 0.30                                  | $1.39 \cdot 10^{17}$                   | H.C. Carbon GmbH, Rednitzhembach, Germany              |
| Mechano Cond 1P4       | 0.37                                  | $3.84 \cdot 10^{12}$                   | H.C. Carbon GmbH, Rednitzhembach, Germany              |
| Mechano Cond 1         | 0.30                                  | $1.76 \cdot 10^2$                      | H.C. Carbon GmbH, Rednitzhembach, Germany              |
| Grafit GS 120          | 0.36                                  | $4.20 \cdot 10^{10}$                   | RMC REMACON GmbH, Säckingen, Germany                   |
| Grafit LUX Carbon 99G  | 0.34                                  | $2.77 \cdot 10^{16}$                   | LUX Carbon Rohstoffhandelsgesellschaft, Essen, Germany |
| Grafit RFL99.5         | 0.40                                  | $1.54 \cdot 10^{13}$                   | Graphit Kropfmühl GmbH, Hauzenberg, Germany            |
| Graphit TG 100/400     | 0.30                                  | $6.87 \cdot 10^{10}$                   | Mineralmühle Leun, Rau GmbH & Co. KG, Leun, Germany    |

**Table S3 part 2.** Thermal conductivity and electrical volume resistivity of PP composites filled with different kinds of graphite at a filler content of 5 vol%.

| Filler name                                                   | Thermal conductivity<br>[W/(m·K)] | Electrical resistivity<br>[Ohm cm] | Manufacturer                                                             |
|---------------------------------------------------------------|-----------------------------------|------------------------------------|--------------------------------------------------------------------------|
| FGM99                                                         | 0.40                              | $2.50 \cdot 10^{16}$               | Grafitbergbau Kaiersberg<br>Ges.m.b.H., St. Stefan ob<br>Leoben, Austria |
| Thielmann<br>Flockengraphit<br>22003                          | 0.42                              | $1.52 \cdot 10^{16}$               | Thielmann Graphite GmbH<br>& Co. KG, Grolsheim,<br>Germany               |
| Technographit<br>großkristallin<br>Natur 70-55<br>(LUH40) LUH | 0.39                              | $4.68 \cdot 10^{16}$               | TECHNOGRAFIT GmbH,<br>Eltsville Germany                                  |
| Synthetischer<br>Graphit min.<br>99.3%<br>(LUH60) LUH         | 0.33                              | $1.22 \cdot 10^{17}$               | TECHNOGRAFIT GmbH,<br>Eltsville Germany                                  |
| Synthetischer<br>Graphit min.<br>99.3%<br>(LUH80) LUH         | 0.33                              | $3.54 \cdot 10^{16}$               | TECHNOGRAFIT GmbH,<br>Eltsville Germany                                  |
| Synthetischer<br>Graphit min.<br>99.3%<br>(LUH100)<br>LUH     | 0.34                              | $1.46 \cdot 10^{17}$               | TECHNOGRAFIT GmbH,<br>Eltsville Germany                                  |
| Synthetischer<br>Graphit min.<br>99.3%<br>TIMCAL              | 0.33                              | $1.27 \cdot 10^{17}$               | TECHNOGRAFIT GmbH,<br>Eltsville Germany                                  |
| TIMREX BNB<br>90                                              | 0.81                              | $5.69 \cdot 10^7$                  | Imerys Graphite & Carbon,<br>Bironice, Switzerland                       |
| Timrex KS150-<br>600                                          | 0.42                              | $5.92 \cdot 10^7$                  | Imerys Graphite & Carbon,<br>Bironice, Switzerland                       |
| Timrex KS75                                                   | 0.36                              | $1.24 \cdot 10^{16}$               | Imerys Graphite & Carbon,<br>Bironice, Switzerland                       |
| Timrex T150-<br>600                                           | 0.39                              | $9.16 \cdot 10^6$                  | Imerys Graphite & Carbon,<br>Bironice, Switzerland                       |
| Timrex T150                                                   | 0.32                              | $3.91 \cdot 10^{14}$               | Imerys Graphite & Carbon,<br>Bironice, Switzerland                       |
| Asbury TC300                                                  | 0.39                              | $3.42 \cdot 10^7$                  | Asbury Graphite Mills, Inc.,<br>New Jersey, United States                |
| Asbury 4012                                                   | 0.32                              | $1.54 \cdot 10^{12}$               | Asbury Graphite Mills, Inc.,<br>New Jersey, United States                |
| Asbury 94002                                                  | 0.28                              | $1.76 \cdot 10^8$                  | Asbury Graphite Mills, Inc.,<br>New Jersey, United States                |
| Remacon GS12                                                  | 0.40                              | $4.37 \cdot 10^{17}$               | RMC REMACON GmbH.<br>Bad Säckingen. Germany                              |

**Table S3 part 3.** Thermal conductivity and electrical volume resistivity of PP composites filled with different kind of graphite at a filler content of 5 vol%.

| <b>Filler name</b>     | <b>Thermal conductivity<br/>[W/(m·K)]</b> | <b>Electrical resistivity<br/>[Ohm cm]</b> | <b>Manufacturer</b>                            |
|------------------------|-------------------------------------------|--------------------------------------------|------------------------------------------------|
| Remacon GS40           | 0.39                                      | $1.07 \cdot 10^{17}$                       | RMC REMACON GmbH,<br>Bad Säckingen, Germany    |
| SGL Sigrafine<br>V1032 | 0.29                                      | $3.93 \cdot 10^{17}$                       | SGL Carbon, Wiesbaden,<br>Germany              |
| Kropfmühl<br>SGA20     | 0.43                                      | $1.44 \cdot 10^{11}$                       | Graphit Kropfmühl GmbH,<br>Hauzenberg, Germany |
| Kropfmühl<br>SC20OS    | 0.55                                      | $9.41 \cdot 10^6$                          | Graphit Kropfmühl GmbH,<br>Hauzenberg, Germany |
